# Supplementary material for: Production of Alkyl Levulinates from Carbohydrate-Derived Chemical Intermediates Using Phosphotungstic Acid Supported on Humin-Derived Activated Carbon (PTA/HAC) as a Recyclable Heterogeneous Acid Catalyst
Source: MDPI journal article supplement (doi:10.3390/chemistry5020057), 2023-04-06
Supplement: s1 [file s1]

Archive with 1 entries (1 files):
- chemistry-2293495-supplementary.pdf
